# Supplementary material for: Pharmacological and genetic activation of cAMP synthesis disrupts cholesterol utilization in Mycobacterium tuberculosis
Source: PubMed Central journal article supplement (PMC8856561; doi:10.1371/journal.ppat.1009862), 2022-02-08

### V-59 <sup>1</sup>H NMR

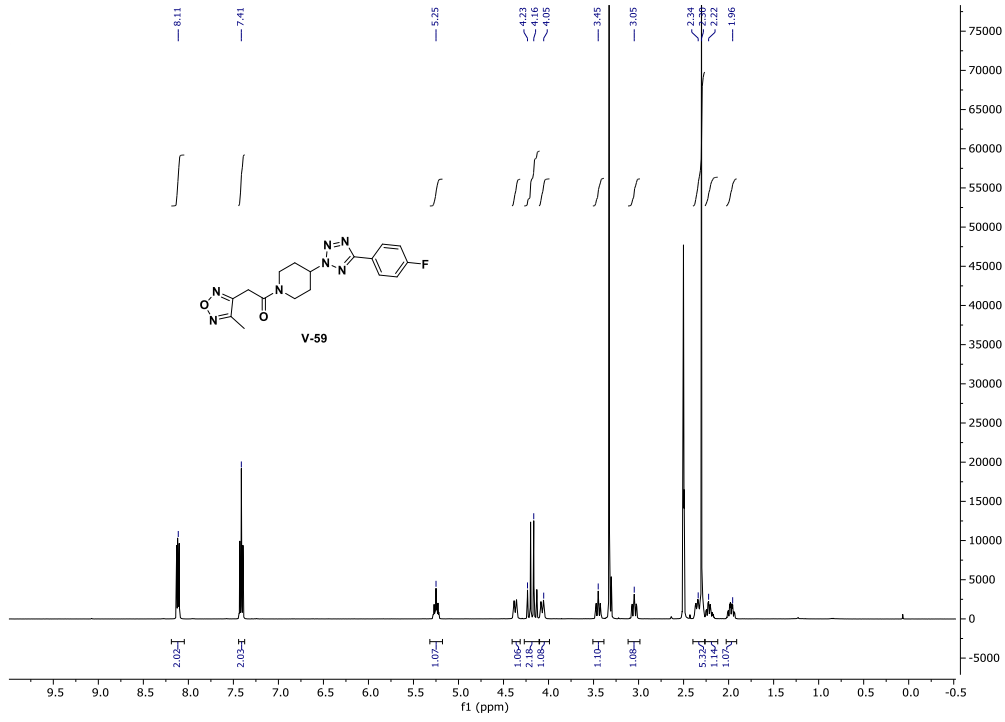

### V-59 <sup>13</sup>C NMR

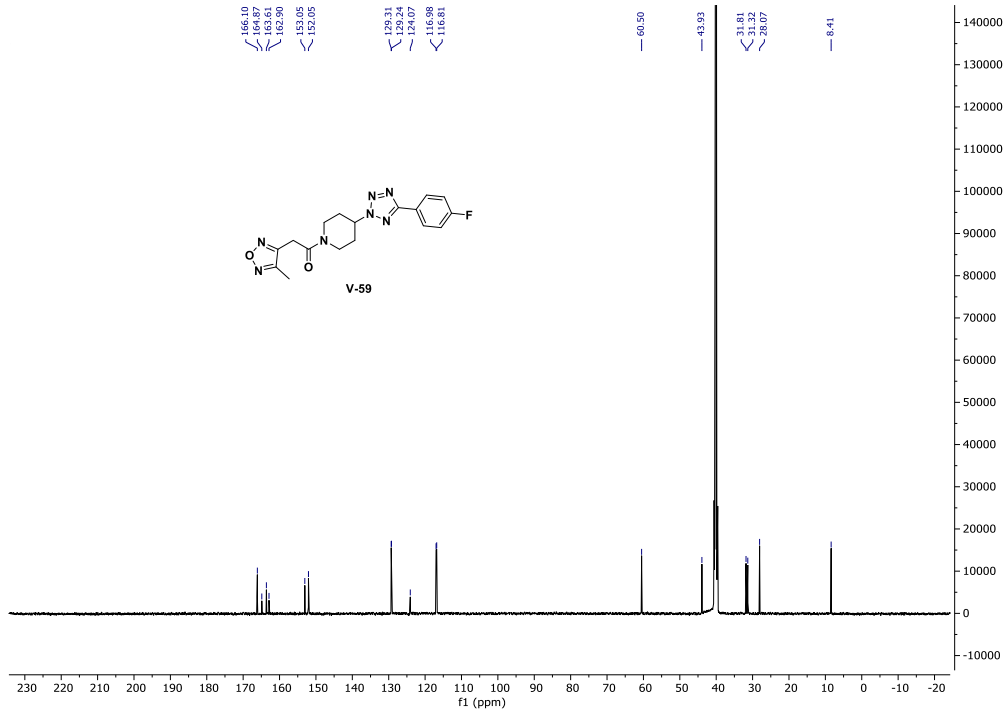

### V-59 <sup>19</sup>F NMR

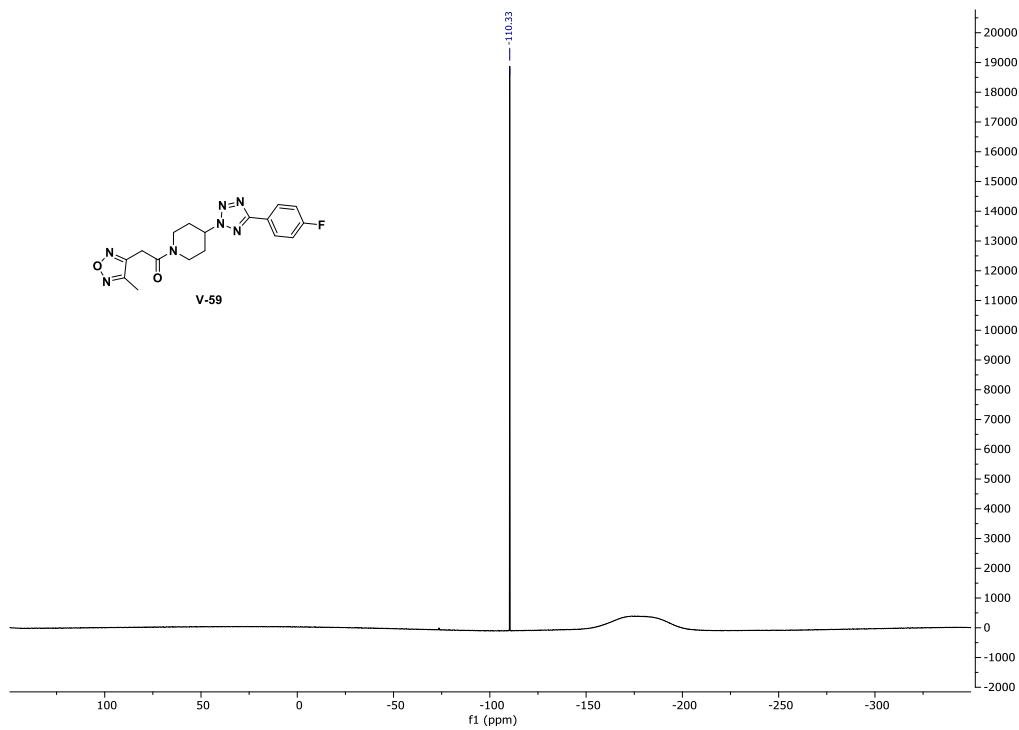

**mCIS635 <sup>1</sup>H NMR**

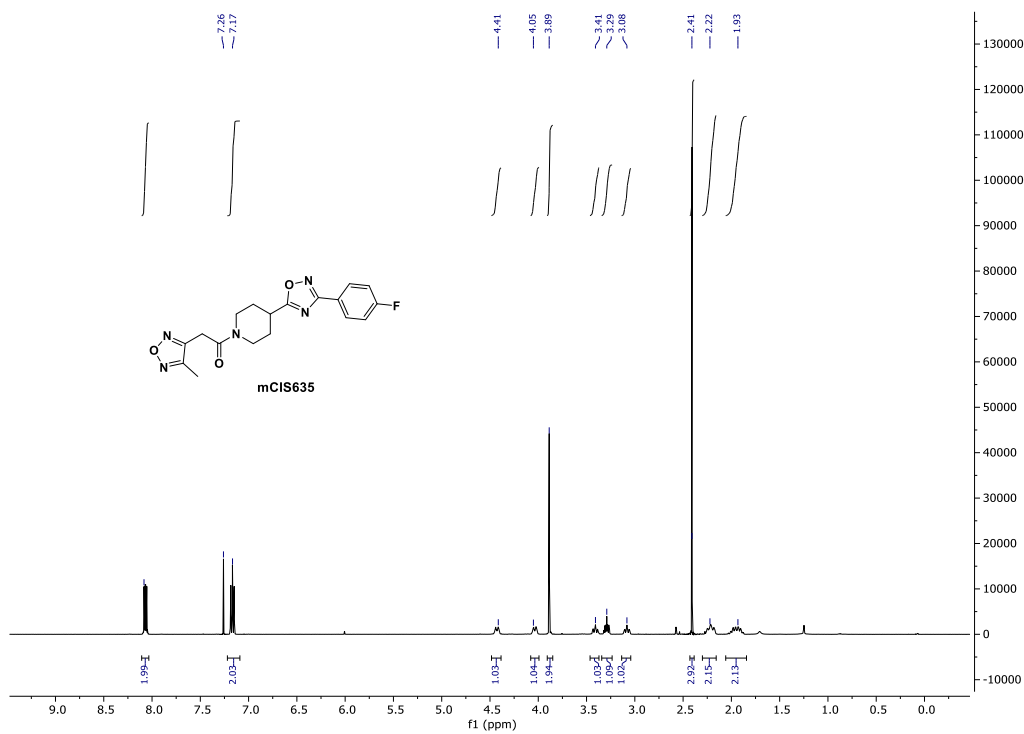

**mCIS635 <sup>13</sup>C NMR**

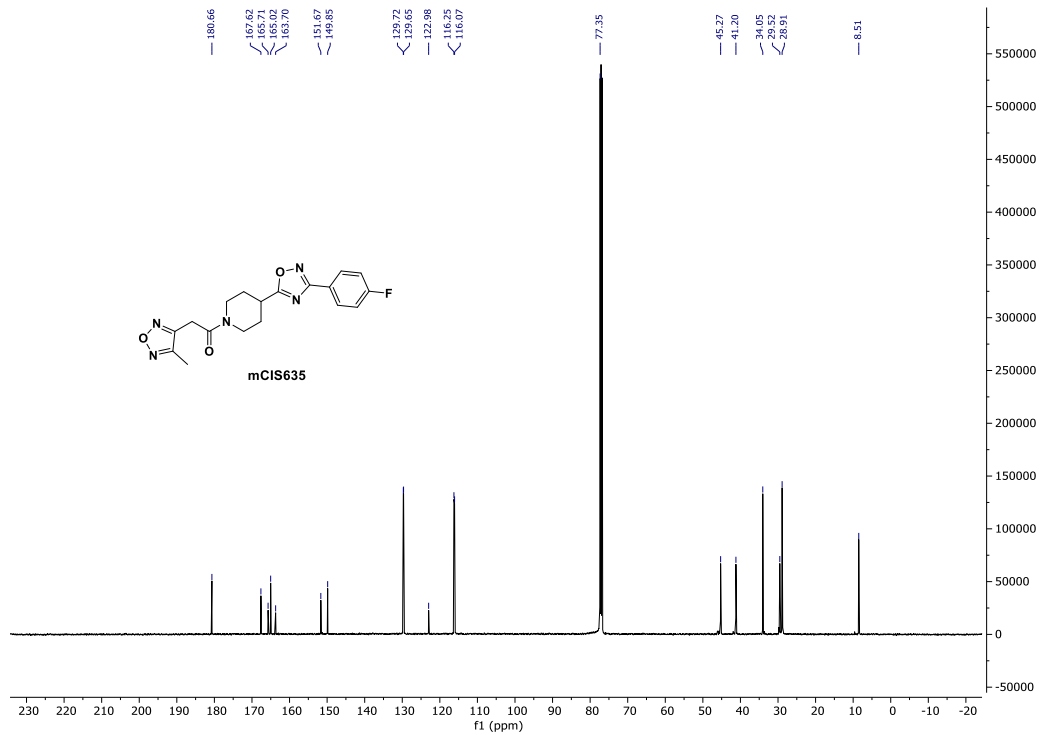

**mCIS635 <sup>19</sup>F NMR**

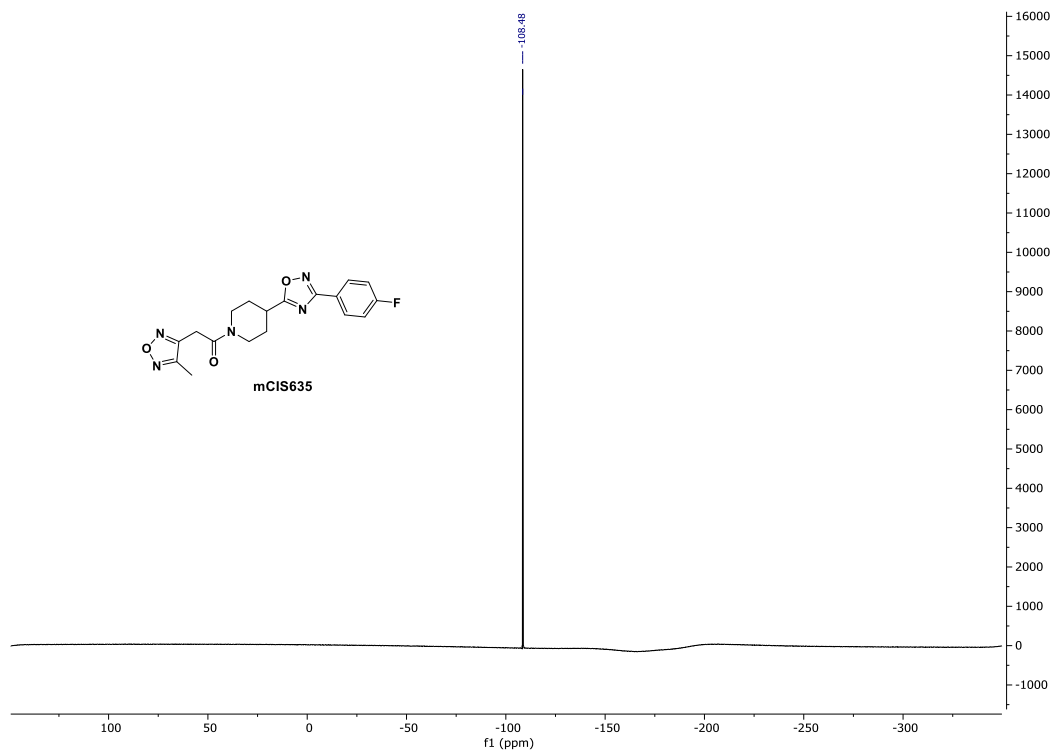

**mCLE299 <sup>1</sup>H NMR**

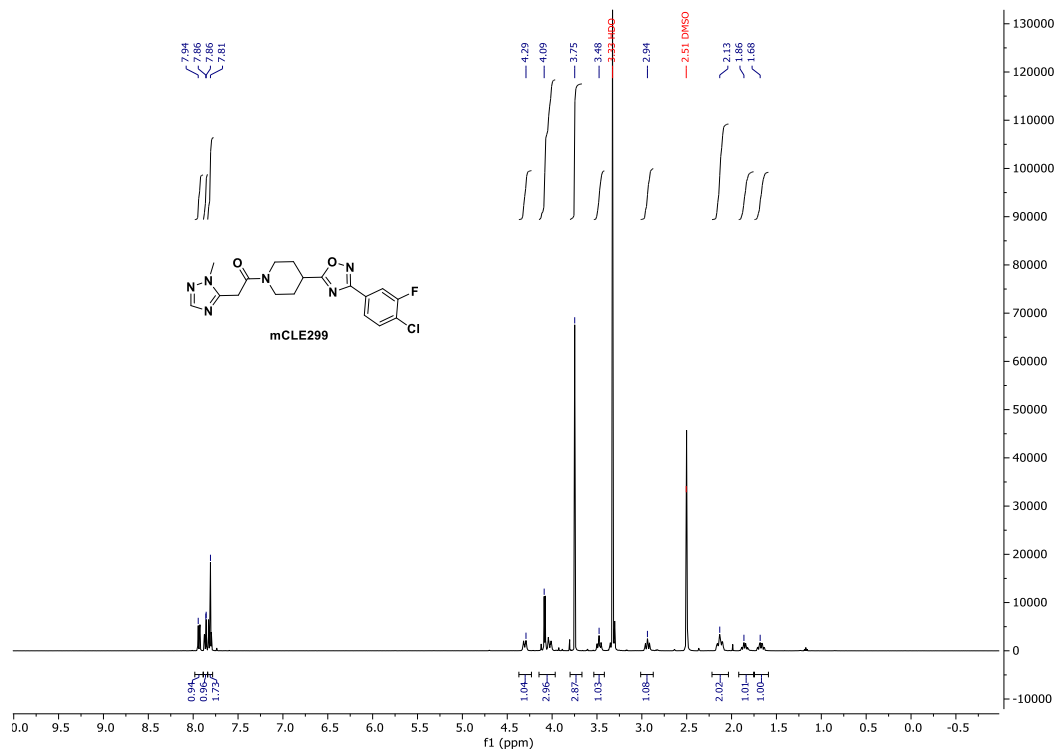

**mCLE299 <sup>13</sup>C NMR**

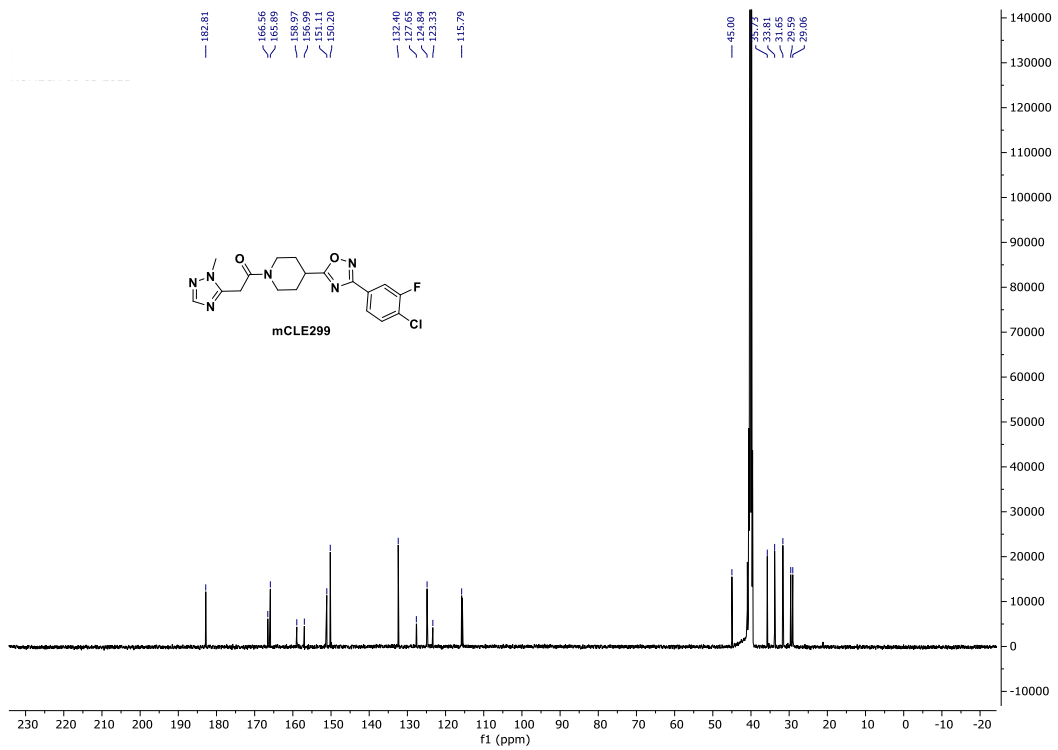

**mCLE299 <sup>19</sup>F NMR**

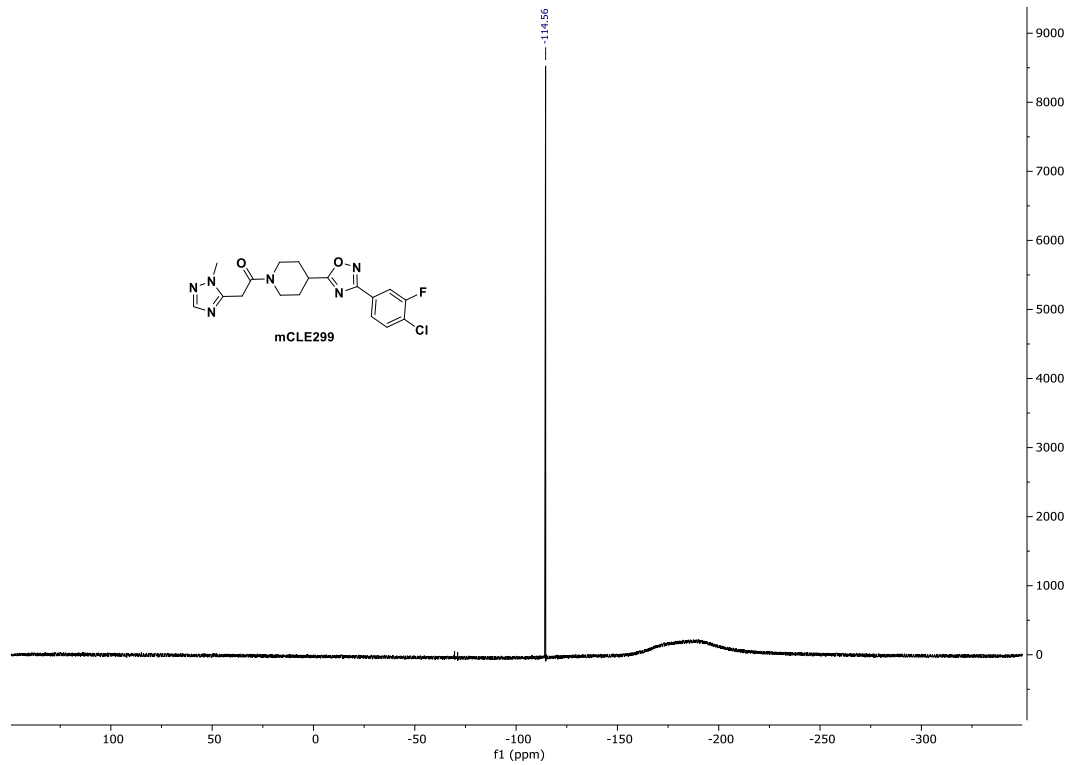

**mCLF177 <sup>1</sup>H NMR**

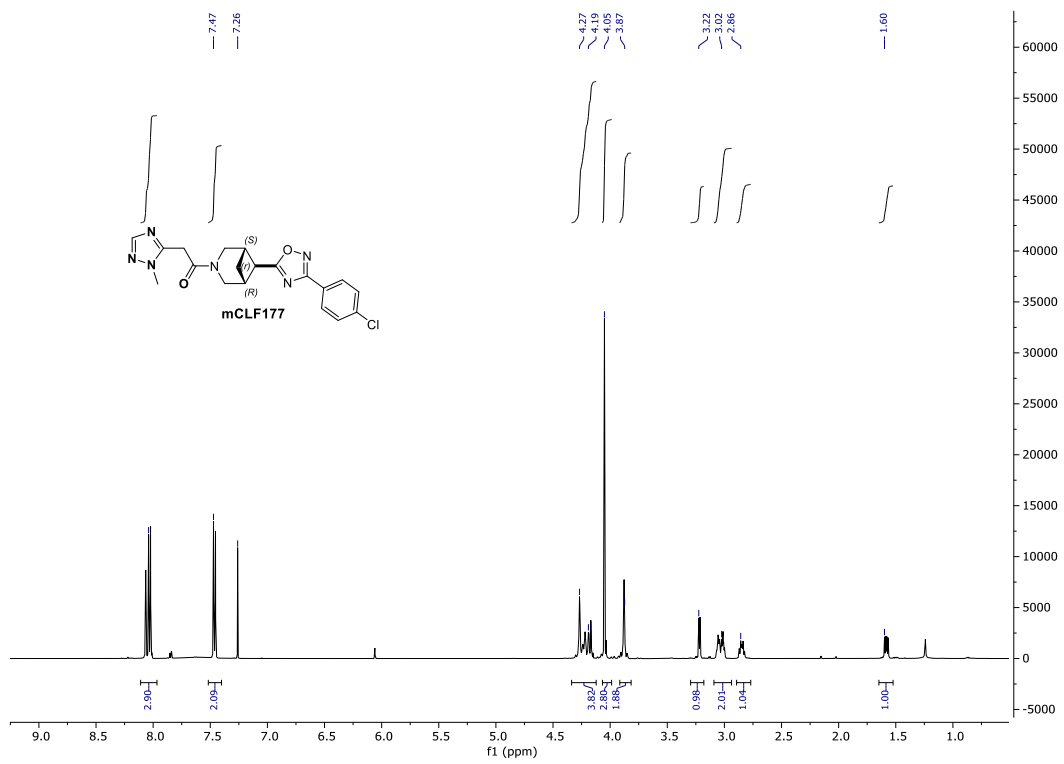

**mCLF177 <sup>13</sup>C NMR**



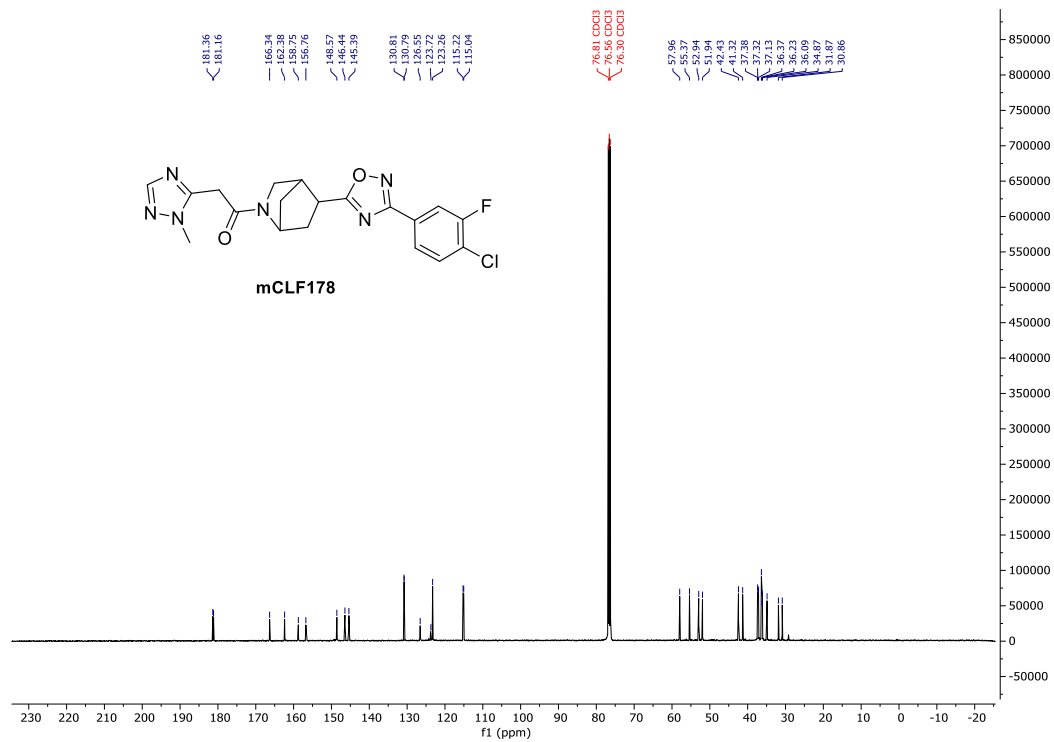

**mCLF178 <sup>19</sup>F NMR**

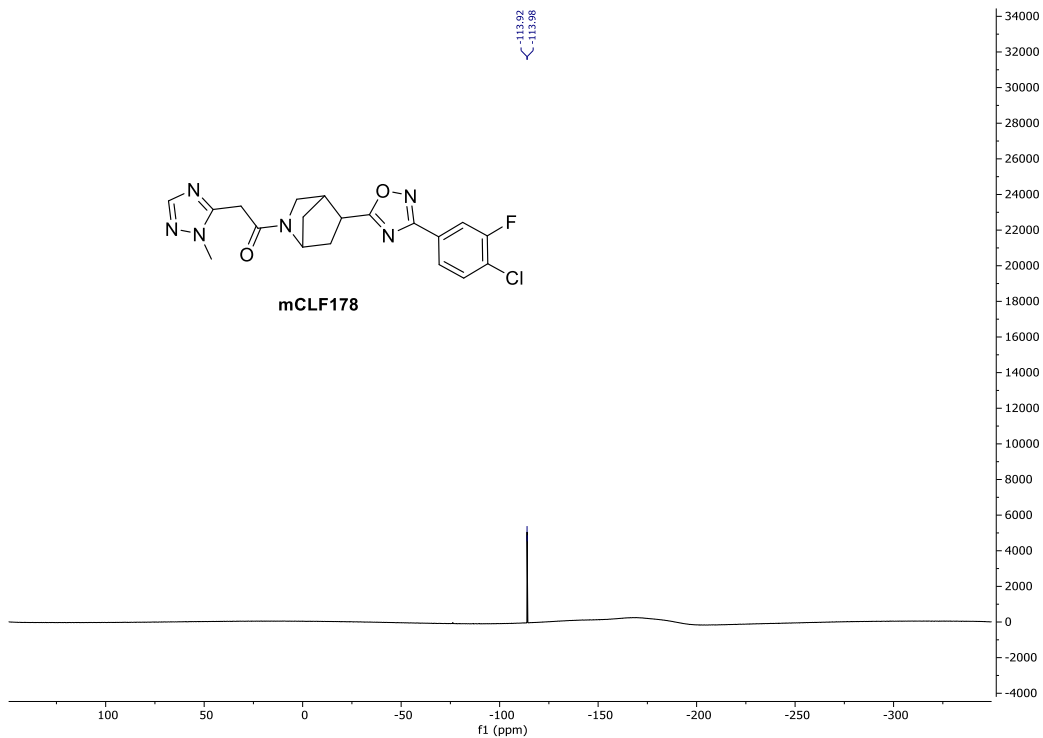

### mCLB073 <sup>1</sup>H NMR

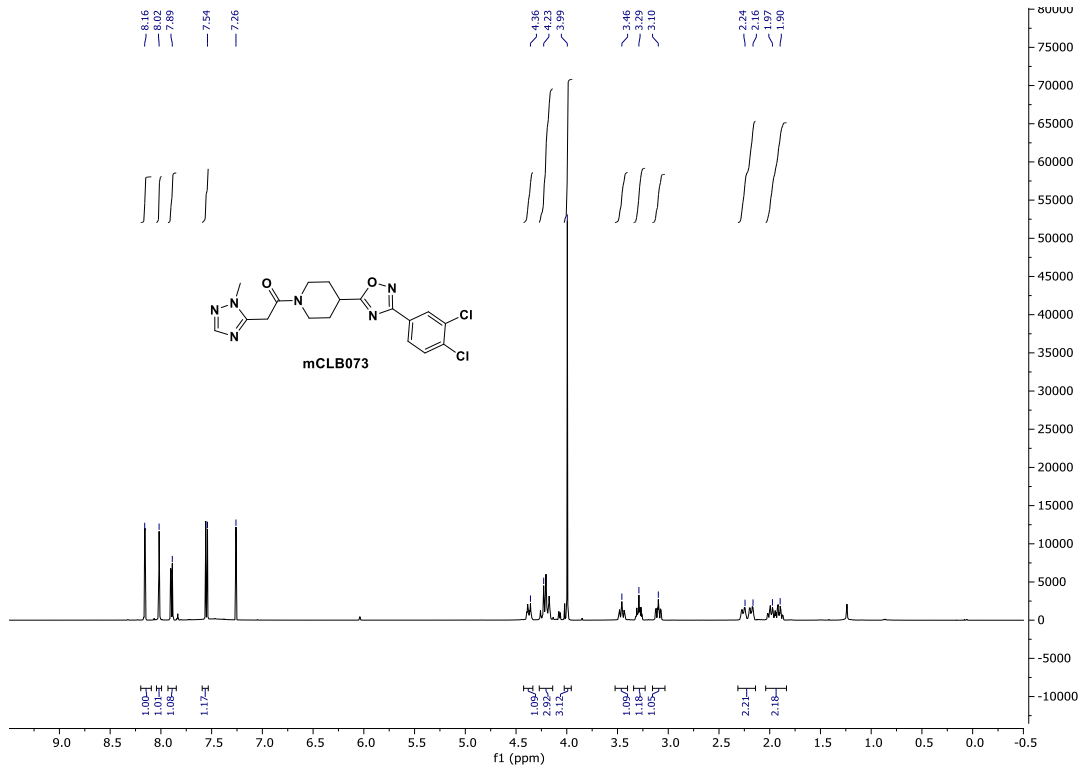

### mCLB073 <sup>13</sup>C NMR

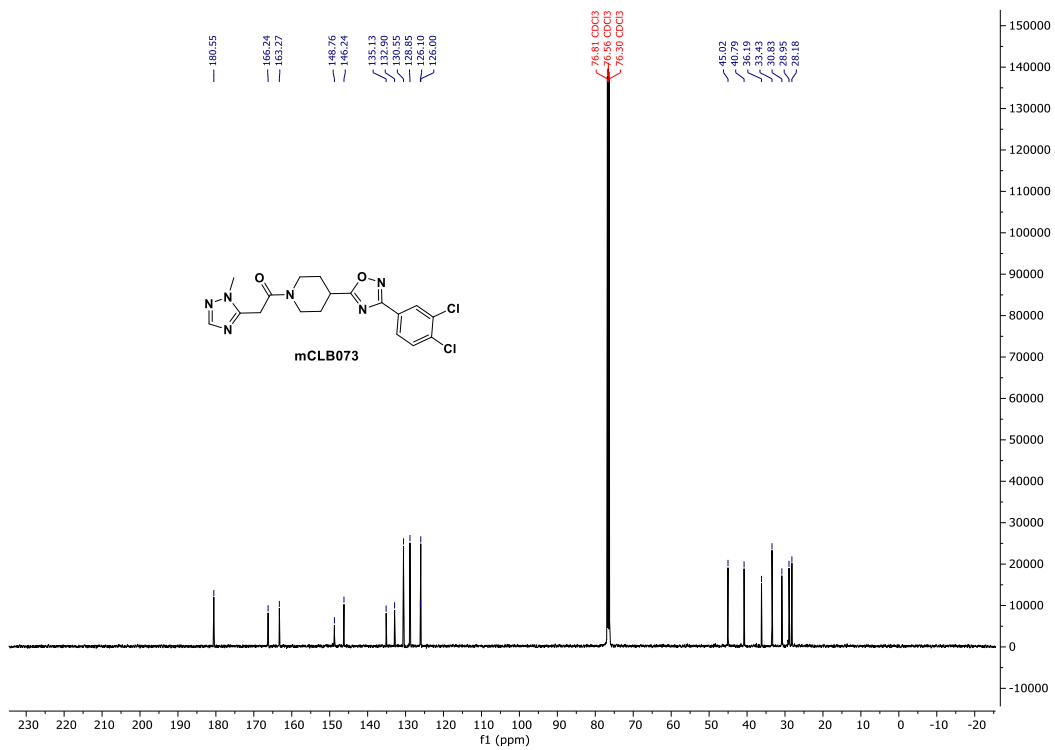



mCLF024 <sup>1</sup>H NMR

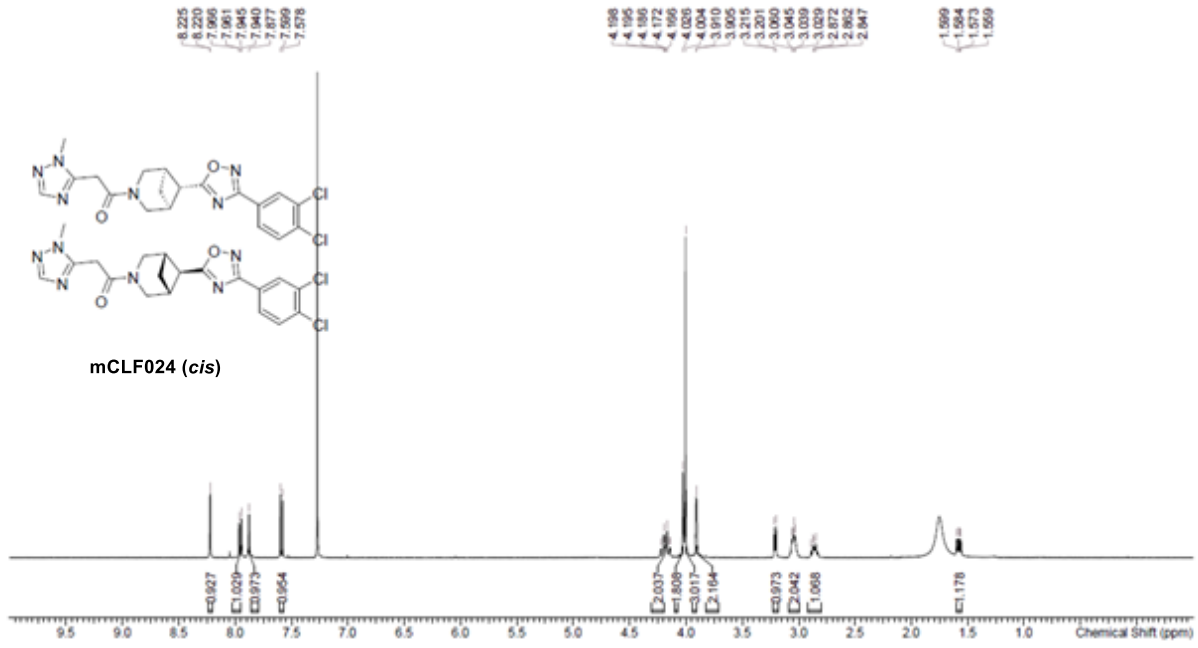

mCLF025 <sup>1</sup>H NMR

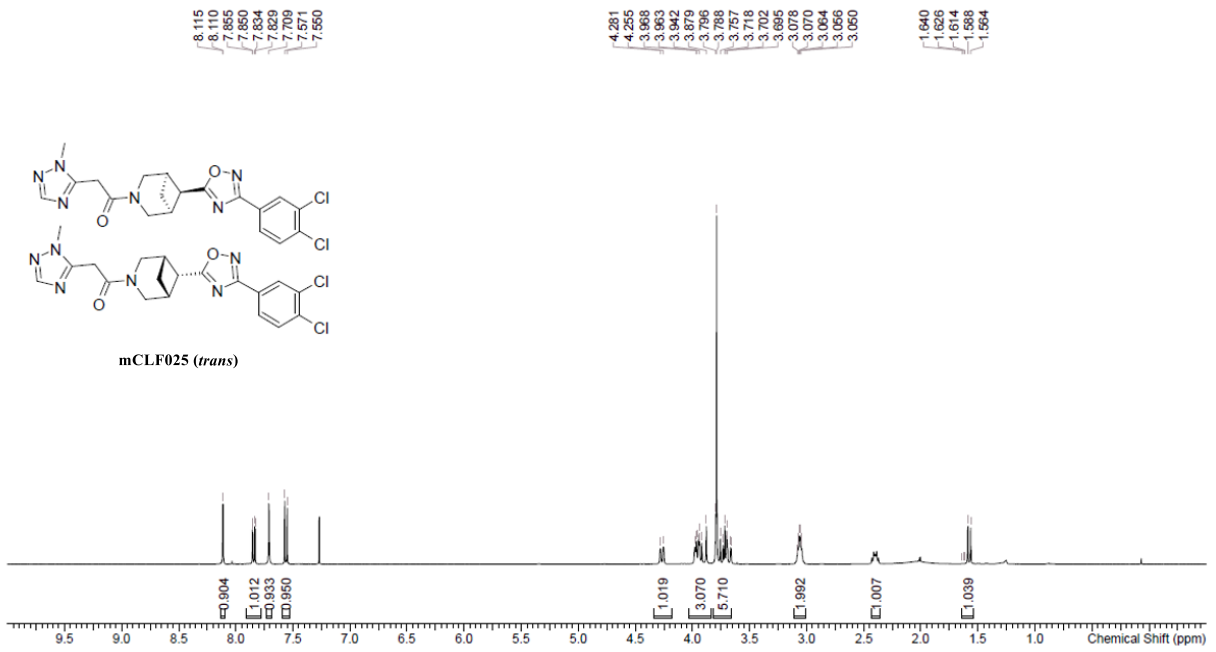

# mCLF025 <sup>13</sup>C NMR

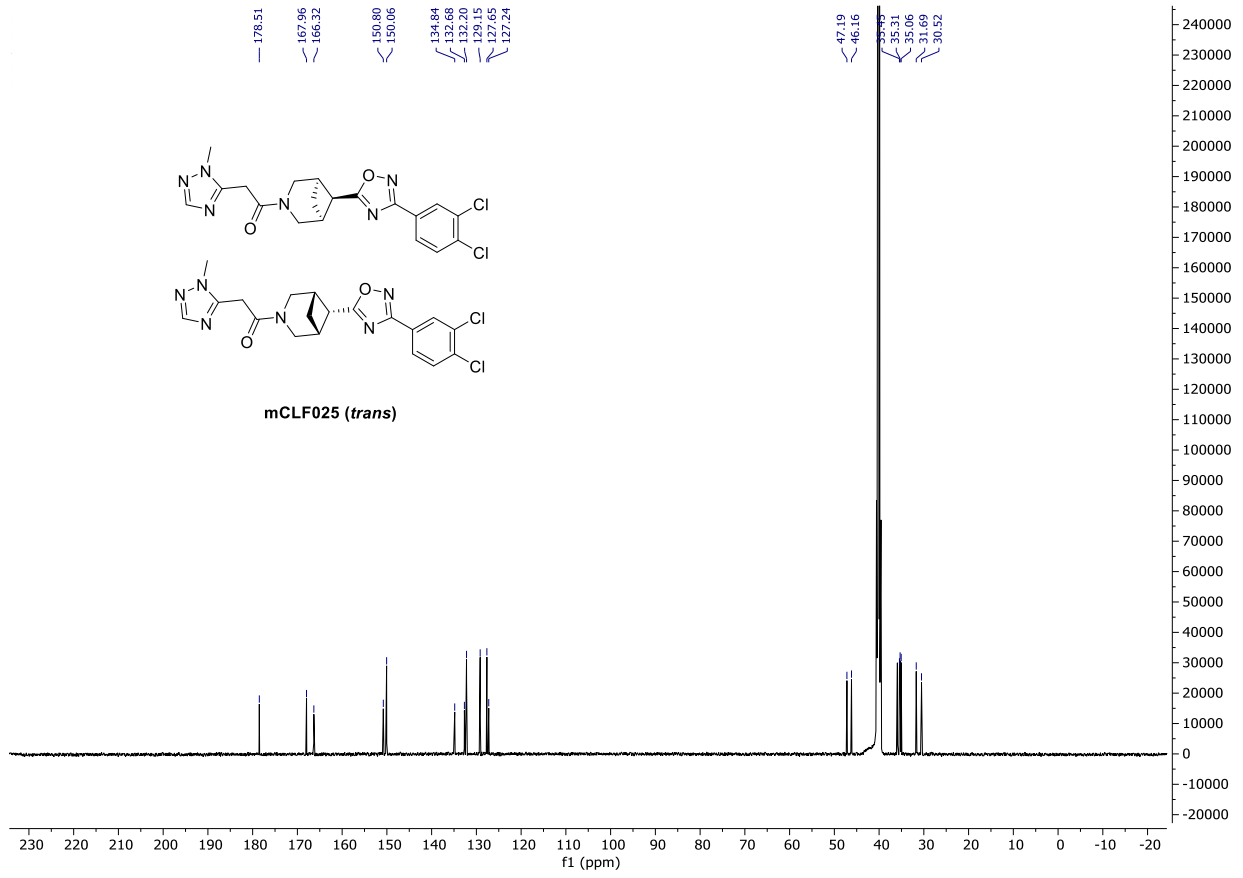

Supplement: ppat.1009862.s012.pdf [file ppat.1009862.s012.pdf]
