# Supplementary material for: Pharmacological and genetic activation of cAMP synthesis disrupts cholesterol utilization in Mycobacterium tuberculosis
Source: PubMed Central journal article supplement (PMC8856561; doi:10.1371/journal.ppat.1009862), 2022-02-08
Supplement: ppat.1009862.s001.pdf [file ppat.1009862.s001.pdf]

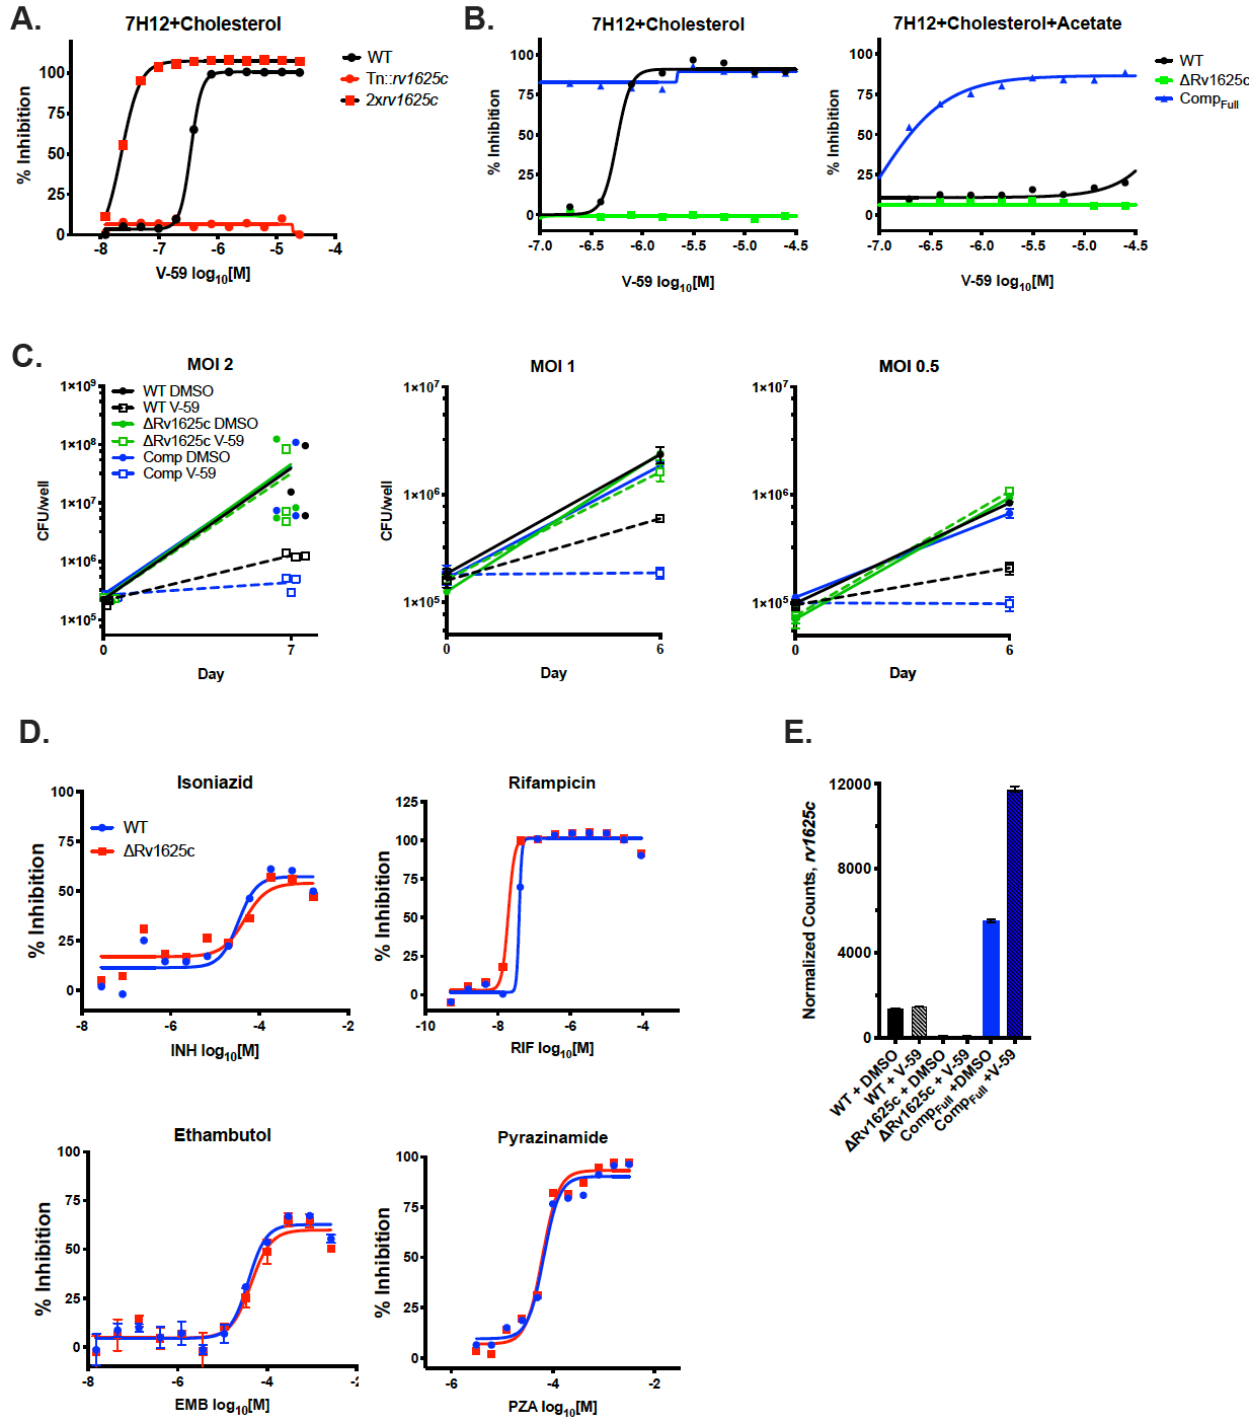

**Fig. S1. The inhibitory activity of V-59 in cholesterol media is dependent on Rv1625c.** (A) Inhibitory activity of V-59 against WT, the Rv1625c transposon mutant (*Tn::rv1625c*), and WT transformed with an overexpression plasmid expressing the *rv1625c* gene (*2xrv1625c*) in 7H12+cholesterol media. (B) Inhibitory activity of V-59 against WT,  $\Delta$ Rv1625c, and Comp<sub>full</sub> in 7H12+cholesterol media (left) or 7H12+cholesterol+acetate media (right). Data shown are representative, from one experiment with two technical replicates. Symbols are mean data points,

and curves display nonlinear fit of dose-response. **(C)** Effect of V-59 on growth of Mtb in murine macrophages. Macrophages were infected at an MOI of 2 (left), 1 (middle), or 0.5 (right) and treated with V-59 (25  $\mu$ M) or DMSO. Data for MOI of 2 are from three experiments, with two or three technical replicates each. Data for MOI of 1 and 0.5 are from one experiments with two or three technical replicates each. Data are shown as means  $\pm$  SD. Each symbol indicates one replicate. **(D)** Effect of frontline antibiotics on WT and  $\Delta$ Rv1625 in 7H12+cholesterol (INH, RIF, EMB) or in MES-buffered 7H9OADC+glycerol, pH 5.9 (PZA). Data shown are representative, from one experiment with two technical replicates. Symbols are mean data points, and curves display nonlinear fit of dose-response. **(E)** RNA-seq derived normalized counts of *rv1625c* reads in WT,  $\Delta$ Rv1625c, and Comp<sub>Full</sub> strains in 7H12+cholesterol media.
