# Supplementary material for: Pharmacological and genetic activation of cAMP synthesis disrupts cholesterol utilization in Mycobacterium tuberculosis
Source: PubMed Central journal article supplement (PMC8856561; doi:10.1371/journal.ppat.1009862), 2022-02-08
Supplement: ppat.1009862.s002.pdf [file ppat.1009862.s002.pdf]

A.

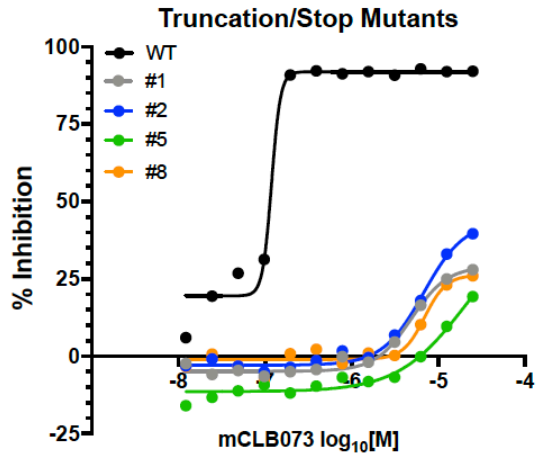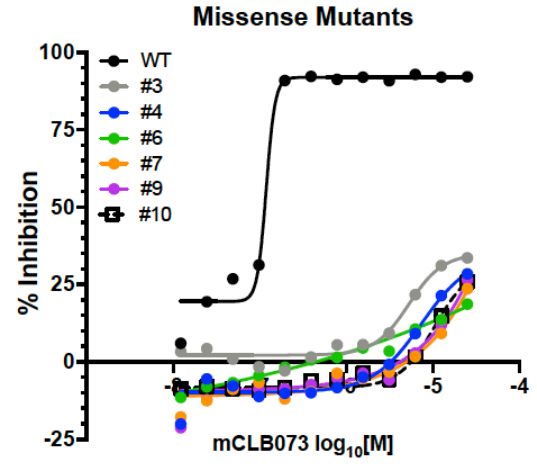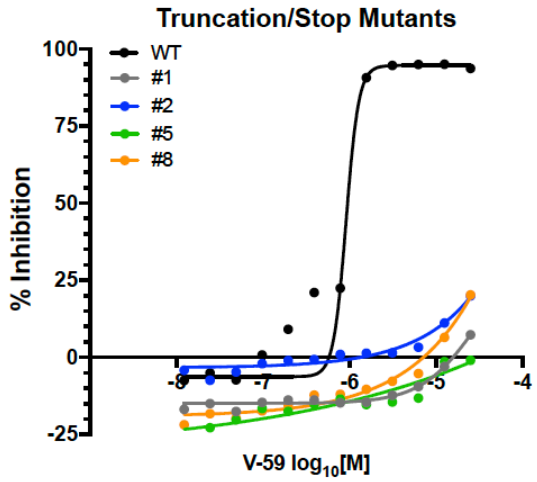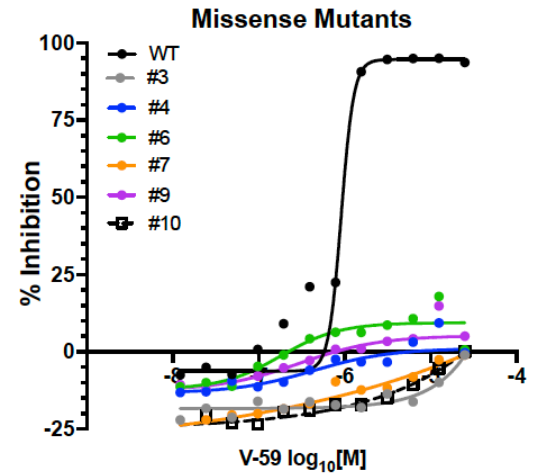

B.

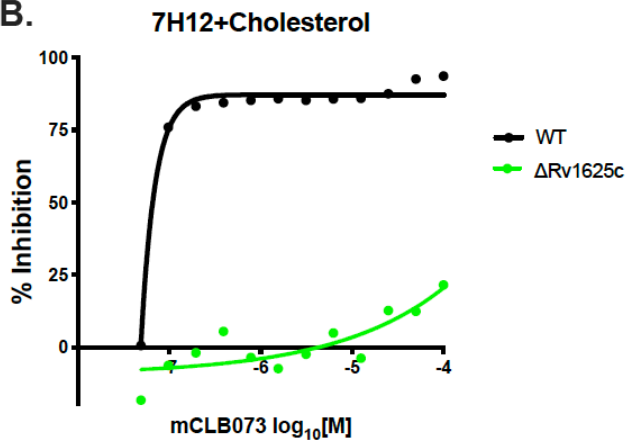

C.

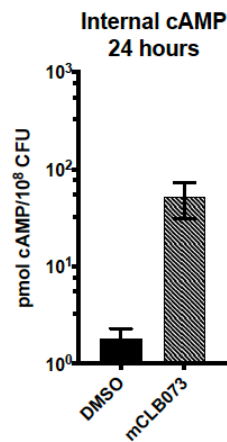

**Fig. S2. The activity of mCLB073 is dependent on Rv1625c.** (A) Inhibitory activity of mCLB073 or V-59 against spontaneous resistant mutants that were generated during culture with mCLB073. (B) Inhibitory activity of mCLB073 against WT or  $\Delta$ Rv1625c in 7H12+cholesterol media. Data shown are representative, from one experiment with two technical replicates. Symbols are mean data points, and curves display nonlinear fit of dose-response. (C) Impact of mCLB073 on cAMP production in WT Mtb. ELISA was used to quantify cAMP from lysed cells 24 hours after addition of mCLB073, or vehicle control (DMSO). Data is from one experiment, with two technical replicates. Data are shown as means  $\pm$  SD.
