# Supplementary material for: Pharmacological and genetic activation of cAMP synthesis disrupts cholesterol utilization in Mycobacterium tuberculosis
Source: PubMed Central journal article supplement (PMC8856561; doi:10.1371/journal.ppat.1009862), 2022-02-08
Supplement: ppat.1009862.s005.pdf [file ppat.1009862.s005.pdf]

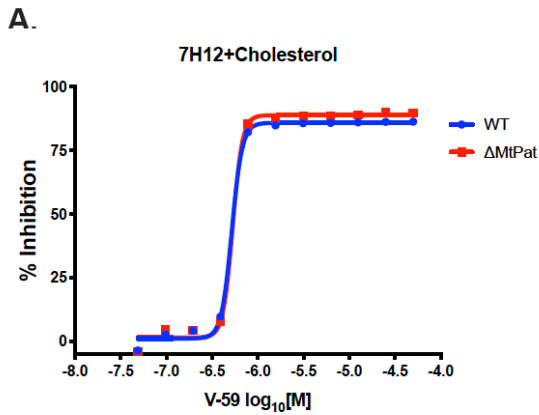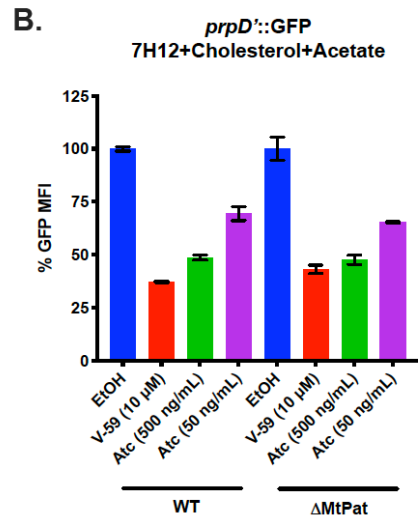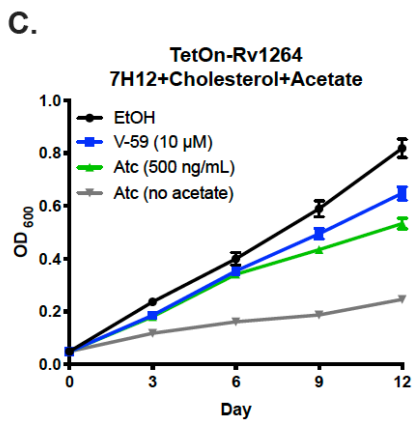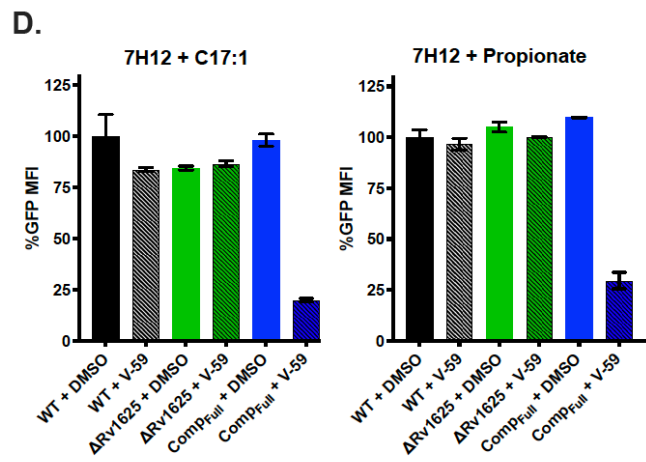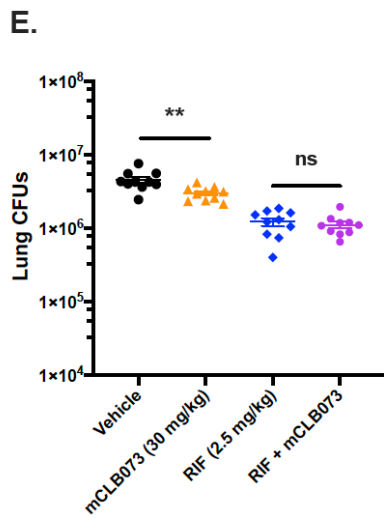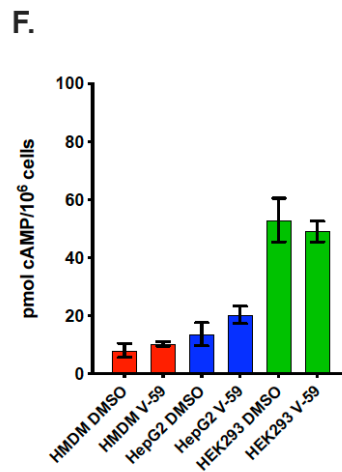

**Fig. S5. Activating cAMP synthesis inhibits lipid metabolism in an Mt-Pat independent mechanism, and can inhibit fatty acid utilization without increasing antibiotic tolerance or increasing mammalian cAMP synthesis.** (A) Inhibitory activity of V-59 against WT or  $\Delta$ Mt-Pat in 7H12+cholesterol media. Data shown are from one experiment with two technical replicates. Symbols are mean data points, and curves display nonlinear fit of dose-response. (B) Relative GFP signal from the *prpD*::GFP reporter in WT versus  $\Delta$ Mt-Pat strains carrying the TetOn-cAMP construct in media containing cholesterol and acetate. Cultures were treated in parallel with EtOH, V-59 (10  $\mu$ M), or Atc at the indicated concentrations. Data are normalized to EtOH vehicle control in each strain. GFP MFI was quantified from 10,000 mCherry<sup>+</sup> Mtb. Data are from one experiment with two technical replicates, shown as means  $\pm$  SD. (C) Effect of inducing TetOn-cAMP on the growth of Mtb in 7H12+cholesterol+acetate media. EtOH, V-59 (10  $\mu$ M), or Atc at the indicated concentrations were added initially and every three days for the duration of the experiment. Data are from one experiment with three technical replicates, shown as means  $\pm$  SD. (D) Relative GFP signal from the *prpD*::GFP reporter in Mtb treated with V-59 or DMSO, in 7H12 media supplemented with C17:1 or propionate. Data shown normalized to WT+DMSO. GFP MFI was quantified from 10,000 mCherry positive Mtb. Data are from one experiment with two technical replicates, shown as means  $\pm$  SD. (E) Effect of mCLB073 treatment combined with a sub-optimal dose of rifampicin (RIF) in BALB/c mice infected by the aerosol route. Data are from one experiment with 10 mice per group (\*\* $P < 0.01$ , Mann-Whitney test). Data are shown as means  $\pm$  SEM. (F) Quantification of cAMP in human cell lines treated with V-59 (10  $\mu$ M) or DMSO control. Data are from one experiment with two technical replicates, and are shown as means  $\pm$  SD.
