# Supplementary material for: Pharmacological and genetic activation of cAMP synthesis disrupts cholesterol utilization in Mycobacterium tuberculosis
Source: PubMed Central journal article supplement (PMC8856561; doi:10.1371/journal.ppat.1009862), 2022-02-08
Supplement: ppat.1009862.s006.pdf [file ppat.1009862.s006.pdf]

|                                       | Rv1625c-Independent Cholesterol Breakdown Inhibitors                              |                                                                                   | Analogues of Previously Published Rv1625c-Dependent Inhibitors                      |                                                                                     |
|---------------------------------------|-----------------------------------------------------------------------------------|-----------------------------------------------------------------------------------|-------------------------------------------------------------------------------------|-------------------------------------------------------------------------------------|
|                                       | V-13-012725                                                                       | V-13-011503                                                                       | sCEB942                                                                             | mCCY224                                                                             |
|                                       | 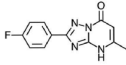 |  |  |  |
| MW                                    | 244                                                                               | 276                                                                               | 426                                                                                 | 468                                                                                 |
| Intramacrophage EC <sub>50</sub> (μM) | 25                                                                                | 25                                                                                | 4.16                                                                                | 2.96                                                                                |
| Cholesterol EC <sub>50</sub> (μM)     | 1.4                                                                               | 5                                                                                 | 0.67                                                                                | 0.35                                                                                |
| 7H9 OADC EC <sub>50</sub> (μM)        | >50                                                                               | >50                                                                               | >20                                                                                 | 9.56                                                                                |
| hERG (%)                              | --                                                                                | --                                                                                | --                                                                                  | 89.09                                                                               |
| HepG2 CC <sub>50</sub> (μM)           | --                                                                                | --                                                                                | --                                                                                  | 20                                                                                  |
| Cyp 1C <sub>50</sub> (μM, 2C19/2C9)   | --                                                                                | --                                                                                | --                                                                                  | 9.55/23.29                                                                          |
| Mouse PPB (%)                         | --                                                                                | --                                                                                | 89.61                                                                               | 99.96                                                                               |
| Caseum binding (% unbound)            | --                                                                                | --                                                                                | 3.34                                                                                | <<0.01                                                                              |
| ER (mouse/human)                      | --                                                                                | --                                                                                | 0.79/0.56                                                                           | 0.48/0.43                                                                           |
| Solubility (mM, pH 6.8)               | --                                                                                | --                                                                                | 183.09                                                                              | 1                                                                                   |
| Time over EC <sub>50</sub>            | --                                                                                | --                                                                                | --                                                                                  | >12h                                                                                |
| CLogP                                 | --                                                                                | --                                                                                | 3.42                                                                                | 4.04                                                                                |
| PSA                                   | --                                                                                | --                                                                                | 109.7                                                                               | 59.3                                                                                |

**Table S1. V-59 is structurally distinct from other cholesterol utilization inhibitors.** Chemical structure of previously published single-step cholesterol breakdown inhibitors, and resynthesized analogs of previously described Rv1625c-dependent inhibitors. MW, molecular weight; --, not determined; EC<sub>50</sub>, half-maximal effective concentration; hERG, human ether-à-go-go-related gene; CC<sub>50</sub>, 50% cytotoxic concentration; PPB, plasma protein binding; IC<sub>50</sub>, half-maximal inhibitory concentration; Cyp, cytochrome P450; ER, extraction ratio; PSA, polar surface area.
