# Supplementary material for: Pharmacological and genetic activation of cAMP synthesis disrupts cholesterol utilization in Mycobacterium tuberculosis
Source: PubMed Central journal article supplement (PMC8856561; doi:10.1371/journal.ppat.1009862), 2022-02-08
Supplement: ppat.1009862.s007.pdf [file ppat.1009862.s007.pdf]

|                                   | mCLF024                                                                           | mCLF025                                                                           |
|-----------------------------------|-----------------------------------------------------------------------------------|-----------------------------------------------------------------------------------|
|                                   | 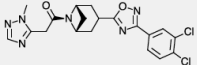 |  |
| MW                                | 433.29                                                                            | 422.29                                                                            |
| <i>In vitro</i> potency assays    |                                                                                   |                                                                                   |
| Macrophages EC <sub>50</sub> (μM) | 97                                                                                | >30,000                                                                           |
| Cholesterol EC <sub>50</sub> (nM) | 49                                                                                | >30,000                                                                           |
| Toxicity                          |                                                                                   |                                                                                   |
| hERG IC <sub>50</sub> (μM)        | 11.8                                                                              | --                                                                                |
| ADME                              |                                                                                   |                                                                                   |
| PBB mouse (% bound)               | 97.8                                                                              | --                                                                                |
| Caseum binding (% unbound)        | <0.01                                                                             | --                                                                                |
| ER mouse/human                    | <0.3/<0.3                                                                         | --                                                                                |
| Solubility (μM, pH 6.8)           | 94.0                                                                              | --                                                                                |

**Table S2. Structures and activities of isomer compounds.** MW, molecular weight; --, not determined; EC<sub>50</sub>, half-maximal effective concentration; IC<sub>50</sub>, half-maximal inhibitory concentration; ADME, absorption, distribution, metabolism, excretion; PBB, plasma protein binding; ER, extraction ratio; PO, per os.
