# Supplementary material for: Pharmacological and genetic activation of cAMP synthesis disrupts cholesterol utilization in Mycobacterium tuberculosis
Source: PubMed Central journal article supplement (PMC8856561; doi:10.1371/journal.ppat.1009862), 2022-02-08
Supplement: ppat.1009862.s008.pdf [file ppat.1009862.s008.pdf]

| Strain      | Location of antibiotic resistance cassette insertion    | Background                     | Antibiotic Resistance |
|-------------|---------------------------------------------------------|--------------------------------|-----------------------|
| Tn::Rv1625c | Mycomar transposon insertion at 904bp of <i>Rv1625c</i> | <i>M. tuberculosis</i> CDC1551 | Kanamycin             |
| ΔRv1625c    | (92-1256bp) of <i>Rv1625c</i>                           | <i>M. tuberculosis</i> CDC1551 | Hygromycin            |
| ΔMt-Pat     | (21-981bp) of <i>Rv0998</i>                             | <i>M. tuberculosis</i> CDC1551 | Hygromycin            |

  

| Strain                                 | Plasmid Constructs                                                                                                | Background                        | Antibiotic Resistance         |
|----------------------------------------|-------------------------------------------------------------------------------------------------------------------|-----------------------------------|-------------------------------|
| 2xRv1625*                              | pMV306+aacC4 (apramycin resistance)+<br>hsp60'::Rv1625c (1-1329bp)                                                | WT <i>M. tuberculosis</i> CDC1551 | Apramycin                     |
| Comp <sub>Full</sub> *                 | pMV306 + aacC4 (apramycin resistance) +<br>hsp60'::Rv1625c (1-1329bp)                                             | ΔRv1625c                          | Hygromycin, Apramycin         |
| Comp <sub>D204</sub> *                 | pMV306+aacC4 (apramycin resistance) +<br>hsp60'::Rv1625c (1-612bp)                                                | ΔRv1625c                          | Hygromycin, Apramycin         |
| TetOn-cAMP**                           | pDE1264 (pDO23A+Rv1264 (627-1191bp) ) +<br>pEN41A-T10M + pEN12A-p606 + pDE43-MEH                                  | WT <i>M. tuberculosis</i> CDC1551 | Hygromycin                    |
| TetOn-Rv1264 <sub>D265A</sub> **       | pDE1264 <sub>D265A</sub> (pDO23A+Rv1264 <sub>D265A</sub> (624-1191bp) )+<br>pEN41A-T10M + pEN12A-p606 + pDE43-MEH | WT <i>M. tuberculosis</i> CDC1551 | Hygromycin                    |
| prpD'::GFP                             | pCherry3 + kanamycin resistance +<br>prpD'::GFP + smyc'::mCherry                                                  | WT <i>M. tuberculosis</i> CDC1551 | Kanamycin                     |
| ΔRv1625c prpD'::GFP                    | pCherry3 + kanamycin resistance +<br>prpD'::GFP + smyc'::mCherry                                                  | ΔRv1625c                          | Kanamycin                     |
| Comp <sub>Full</sub> prpD'::GFP        | pCherry3 + zeocin resistance +<br>prpD'::GFP + smyc'::mCherry                                                     | Comp <sub>Full</sub>              | Hygromycin, Apramycin, Zeocin |
| Comp <sub>D204</sub> prpD'::GFP        | pCherry3 + zeocin resistance +<br>prpD'::GFP + smyc'::mCherry                                                     | Comp <sub>D265A</sub>             | Hygromycin, Apramycin, Zeocin |
| TetOn-cAMP prpD'::GFP                  | TetOn-cAMP + prpD'::GFP + smyc'::mCherry                                                                          | WT <i>M. tuberculosis</i> CDC1551 | Hygromycin                    |
| ΔMt-Pat TetOn-cAMP prpD'::GFP          | TetOn-cAMP + kanamycin resistance +<br>prpD'::GFP + smyc'::mCherry                                                | ΔMt-Pat                           | Hygromycin, Kanamycin         |
| TetOn-1264 <sub>D265A</sub> prpD'::GFP | TetOn-Rv1264 <sub>D265A</sub> + prpD'::GFP + smyc'::mCherry                                                       | WT <i>M. tuberculosis</i> CDC1551 | Hygromycin                    |

\*Apramycin gene sourced from Consaul SA, Pavelka MS Jr. Use of a novel allele of the *Escherichia coli* aacC4 aminoglycoside resistance gene as a genetic marker in mycobacteria. *FEMS Microbiol Lett.* 2004 May 15;234(2):297-301. doi: 10.1016/j.femsle.2004.03.041. PMID: 15135536.

\*\*Plasmids for Gateway cloning to construct TetOn-cAMP and TetOn-Rv1264<sub>D265A</sub> developed from Klotzsche M, Ehrh S, Schnappinger D. Improved tetracycline repressors for gene silencing in mycobacteria. *Nucleic Acids Res.* 2009 Apr;37(6):1778-88. doi: 10.1093/nar/gkp015. PMID: 19174563.

**Table S3. Mtb strains used in these experiments.**
